# Supplementary material
Source: publisher site journal article supplement (https://www.spandidos-publications.com/2705/downloadSupplementary)
Supplement: Supplementary file 1 [file downloadSupplementary]

Figure S1. Effect of miR-769-5p inhibition on cell motility. (A and B) miR-769-5p inhibition influenced neither (A) migration in DU145 nor (B) invasion in PC-3. Values are expressed as the mean  $\pm$  standard deviation (n=3). miR, microRNA; Neg, negative control.

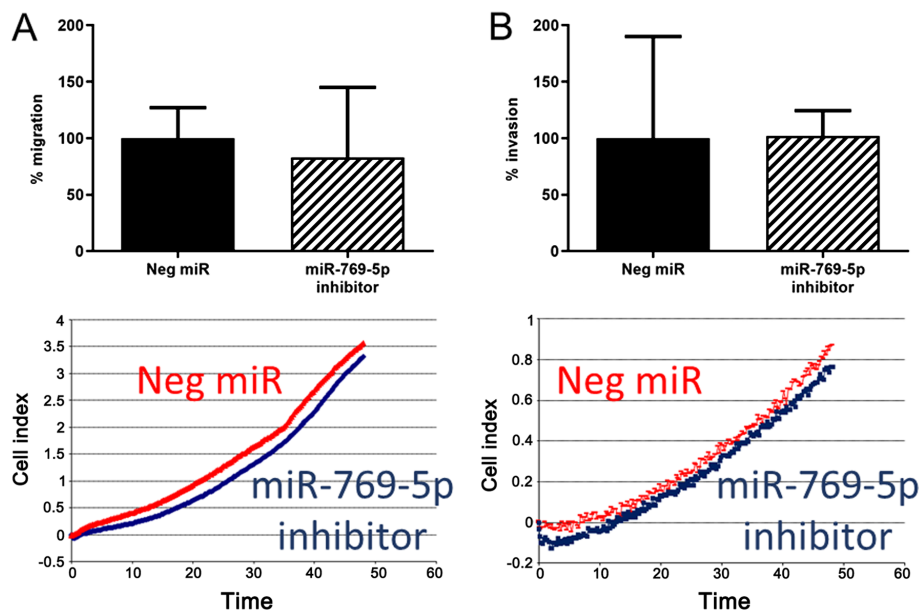

Table SI. Luciferase reporter constructs.

| Gene          | Sequence                                                                                                                                                                                                                                                                                                                                                                                                                                                                                                                                                                                                                                                                                                                                                                                                     |
|---------------|--------------------------------------------------------------------------------------------------------------------------------------------------------------------------------------------------------------------------------------------------------------------------------------------------------------------------------------------------------------------------------------------------------------------------------------------------------------------------------------------------------------------------------------------------------------------------------------------------------------------------------------------------------------------------------------------------------------------------------------------------------------------------------------------------------------|
| ARHGAP10 WT   | CTCCTGGCCTCAGAGCCCCTGCTGACCCTGGCACCCAGGGACC<br>TGCTGGGGGCAGAGAGCTGTCTTCCTCCTCCGAGGCTCTGGG<br>CTGCACCCACAGGTACCTCCACACTTGGGAGTTACCATCATCA<br>CAGTCAGCCCTGGGGGTGGGGGGTGGTGGGCAGGGATGGGAC<br>GCACCACACAGA AACTGTGATTGTGGATCAGGAGGGGAATGTCA<br>GGATTCGCAAAATGGACTTTTCATTTGTCAAGTATTGGGACTTG<br>TGATTTTTAATTATCCAGCATATAGAATGAGAGGGAGGGCAGC<br>CTTCTGCCACCTGTGTGCGCTCCACTGGCAGTCACGCCACCAGA<br>GCCACCCTGGCTCCCTCTCCTCCCTGAGCACCTGCTGCTGCGAT<br>TTAAAGGGAACTGTACTACTCGCAGTGATAGGTTTGCAGAGT<br>GTGTGCTTGGCTGTGGCAGCCTAGCTTGGAGAAGCTGCTGTTG<br>GTGCAAGGGAGAT(GGTCTC)AAGTCAGAGGGAAGCAGAGACG<br>CGCGTCTCAAGCCTGCCCTTCCTAGACGGCCACCTGCAGGACC<br>CCACACTACTGCACTGGCAGCGTGCCTGGCGTATTTGTAAC<br>AGGCTTCTCGGTGCTCCTCACCCGTGTGCTGTTTTCCAAACACC<br>ACCTTTTTGCCTCA(AGGTCTC)TGTAATGAAATAAACTGTAAT<br>TTAATAAAAAAAAAAAAAAAAAAAAA |
| ARHGAP10 MUT1 | CTCCTGGCCTCAGAGCCCCTGCTGACCCTGGCACCCAGGGACC<br>TGCTGGGGGCAGAGAGCTGTCTTCCTCCTCCGAGGCTCTGGG<br>CTGCACCCACAGGTACCTCCACACTTGGGAGTTACCATCATCA<br>CAGTCAGCCCTGGGGGTGGGGGGTGGTGGGCAGGGATGGGAC<br>GCACCACACAGA AACTGTGATTGTGGATCAGGAGGGGAATGTCA<br>GGATTCGCAAAATGGACTTTTCATTTGTCAAGTATTGGGACTTG<br>TGATTTTTAATTATCCAGCATATAGAATGAGAGGGAGGGCAGC<br>CTTCTGCCACCTGTGTGCGCTCCACTGGCAGTCACGCCACCAGA<br>GCCACCCTGGCTCCCTCTCCTCCCTGAGCACCTGCTGCTGCGAT<br>TTAAAGGGAACTGTACTACTCGCAGTGATAGGTTTGCAGAGT<br>GTGTGCTTGGCTGTGGCAGCCTAGCTTGGAGAAGCTGCTGTTG<br>GTGCAAGGGAGAT(AAAGGG)AAGTCAGAGGGAAGCAGAGACG<br>CGCGTCTCAAGCCTGCCCTTCCTAGACGGCCACCTGCAGGACC<br>CCACACTACTGCACTGGCAGCGTGCCTGGCGTATTTGTAAC<br>AGGCTTCTCGGTGCTCCTCACCCGTGTGCTGTTTTCCAAACACC<br>ACCTTTTTGCCTCA(AGGTCTC)TGTAATGAAATAAACTGTAAT<br>TTAATAAAAAAAAAAAAAAAAAAAAA |
| ARHGAP10 MUT2 | CTCCTGGCCTCAGAGCCCCTGCTGACCCTGGCACCCAGGGACC<br>TGCTGGGGGCAGAGAGCTGTCTTCCTCCTCCGAGGCTCTGGG<br>CTGCACCCACAGGTACCTCCACACTTGGGAGTTACCATCATCA<br>CAGTCAGCCCTGGGGGTGGGGGGTGGTGGGCAGGGATGGGAC<br>GCACCACACAGA AACTGTGATTGTGGATCAGGAGGGGAATGTCA<br>GGATTCGCAAAATGGACTTTTCATTTGTCAAGTATTGGGACTTG<br>TGATTTTTAATTATCCAGCATATAGAATGAGAGGGAGGGCAGC<br>CTTCTGCCACCTGTGTGCGCTCCACTGGCAGTCACGCCACCAGA<br>GCCACCCTGGCTCCCTCTCCTCCCTGAGCACCTGCTGCTGCGAT<br>TTAAAGGGAACTGTACTACTCGCAGTGATAGGTTTGCAGAGT<br>GTGTGCTTGGCTGTGGCAGCCTAGCTTGGAGAAGCTGCTGTTG<br>GTGCAAGGGAGAT(GGTCTC)AAGTCAGAGGGAAGCAGAGACG<br>CGCGTCTCAAGCCTGCCCTTCCTAGACGGCCACCTGCAGGACC<br>CCACACTACTGCACTGGCAGCGTGCCTGGCGTATTTGTAAC<br>AGGCTTCTCGGTGCTCCTCACCCGTGTGCTGTTTTCCAAACACC<br>ACCTTTTTGCCTCA(CCCAAA)TGTAATGAAATAAACTGTAAT<br>TTAATAAAAAAAAAAAAAAAAAAAAA  |

Table SI. Continued.

| Gene            | Sequence                                                                                                                                                                                                                                                                                                                                                                                                                                                                                                                                                                                                                                                                                                                                                                                                   |
|-----------------|------------------------------------------------------------------------------------------------------------------------------------------------------------------------------------------------------------------------------------------------------------------------------------------------------------------------------------------------------------------------------------------------------------------------------------------------------------------------------------------------------------------------------------------------------------------------------------------------------------------------------------------------------------------------------------------------------------------------------------------------------------------------------------------------------------|
| ARHGAP10 MUT1+2 | CTCCTGGCCTCAGAGCCCCTGCTGACCCTGGCACCCAGGGACC<br>TGCCTGGGGGCAGAGAGCTGTCTTCCTCCTCCGAGGCTCTGGG<br>CTGCACCCACAGGTACCTCCACACTTGGGAGTTACCATCATCA<br>CAGTCAGCCCTGGGGGTGGGGGGTGGTGGGCAGGGATGGGAC<br>GCACCACACAGAACTGTGATTGTGGATCAGGAGGGGAATGTCA<br>GGATTCGCAAAATGGACTTTTCATTTGTCAAGTATTGGGACTTG<br>TGATTTTTAATTATCCAGCATATAGAATGAGAGGGAGGGCAGC<br>CTTCTGCCACCTGTGTCGCCTCCACTGGCAGTCACGCCACCAGA<br>GCCACCCTGGCTCCCTCTCCTCCCTGAGCACCTGCTGCTGCGAT<br>TTAAAGGGAACTGTACTACTCGCAGTGATAGGTTTGCAGAGT<br>GTGTGCTTGGCTGTGGCAGCCTAGCTTGGAGAAGCTGCTGTTG<br>GTGCAAGGGAGAT(AAAGGG)AAGTCAGAGGGAAGCAGAGACG<br>CGCGTCTCAAGCCTGCCCTTCCTAGACGGCCACCTGCAGGACC<br>CCACACTCACTGCACTGGCAGCGTGCCTGGCGTATTTGTAAC<br>AGGCTTCTCGGTGCTCCTCACCCGTGTGCTGTTTTCCAAACACC<br>ACCTTTTTGCCTCA(CCCAAAA)TGTAATGAAATAAACTGTAAT<br>TACTAAAAAAAAAAAAAAAAAAAA |

Bracketed areas represent the complementary binding sequence for miR-769-5p as well as the mutated bases in the mutant forms. Mut, mutant; WT, wild-type.

Table SII. Selected candidate gene targets of miR-769-5p in DU145 and PC-3.

A, DU145

| Log <sub>2</sub> Fold Δ | P-value   | Gene                  |
|-------------------------|-----------|-----------------------|
| -2.342544               | 3.27E-196 | AGPAT1 <sup>a</sup>   |
| -2.189684               | 6.63E-138 | RUNX3 <sup>a</sup>    |
| -1.992766               | 1.59E-143 | ATP6V1C1 <sup>a</sup> |
| -1.80693                | 8.12E-95  | B3GALT6 <sup>a</sup>  |
| -1.709423               | 8.61E-25  | GJB7                  |
| -1.605018               | 3.30E-64  | KREMEN1 <sup>a</sup>  |
| -1.551363               | 2.13E-58  | CERCAM <sup>a</sup>   |
| -1.54224                | 0.000967  | COL5A1                |
| -1.530549               | 1.52E-108 | CCNDBP1 <sup>a</sup>  |
| -1.508622               | 1.81E-59  | ARHGAP10 <sup>a</sup> |
| -1.502003               | 9.92E-74  | DDIT3 <sup>a</sup>    |
| -1.486378               | 7.15E-154 | FAM167A <sup>a</sup>  |
| -1.469792               | 3.35E-52  | SLC35D1 <sup>a</sup>  |
| -1.466198               | 5.22E-06  | HTR7 <sup>a</sup>     |
| -1.463738               | 1.02E-22  | FHL3 <sup>a</sup>     |
| -1.444438               | 3.44E-14  | CPA4 <sup>a</sup>     |
| -1.443158               | 3.38E-108 | CDH1 <sup>a</sup>     |
| -1.423682               | 7.98E-130 | PHF5A <sup>a</sup>    |
| -1.420213               | 7.19E-53  | TFAM <sup>a</sup>     |
| -1.395702               | 5.88E-46  | ZADH2 <sup>a</sup>    |
| -1.377184               | 2.81E-56  | TK2 <sup>a</sup>      |
| -1.357833               | 4.88E-13  | MX2 <sup>a</sup>      |
| -1.306699               | 1.74E-16  | COPZ2 <sup>a</sup>    |
| -1.27103                | 7.73E-23  | KCTD11 <sup>a</sup>   |
| -1.250755               | 1.82E-16  | PPM1L                 |
| -1.237424               | 4.93E-46  | MORN4 <sup>a</sup>    |
| -1.234926               | 2.33E-92  | PRUNE <sup>a</sup>    |
| -1.22553                | 5.46E-118 | FKBP5 <sup>a</sup>    |
| -1.211856               | 4.32E-46  | MLLT6                 |
| -1.187327               | 5.14E-54  | TBC1D13 <sup>a</sup>  |
| -1.178658               | 2.19E-09  | TMEM154               |
| -1.17065                | 1.02E-57  | ENC1                  |
| -1.157368               | 2.82E-47  | FBXO21 <sup>a</sup>   |
| -1.156569               | 3.52E-40  | HEYL                  |
| -1.147648               | 4.58E-19  | BIN3 <sup>a</sup>     |
| -1.137515               | 1.43E-21  | FBLN5 <sup>a</sup>    |
| -1.078594               | 6.78E-28  | KCTD12 <sup>a</sup>   |
| -1.077083               | 8.73E-10  | LZTS1                 |
| -1.076987               | 2.16E-39  | GIN51 <sup>a</sup>    |
| -1.070394               | 2.44E-10  | MUC3A                 |
| -1.0661                 | 1.08E-42  | MBP <sup>a</sup>      |
| -1.051708               | 1.04E-06  | FXYD6                 |
| -1.043364               | 1.88E-65  | PPFIBP1 <sup>a</sup>  |
| -1.034609               | 0.000386  | NKD1                  |
| -1.025286               | 7.22E-20  | CBX7 <sup>a</sup>     |
| -1.019029               | 8.39E-21  | TTYH2                 |
| -1.005169               | 2.82E-59  | SNX18 <sup>a</sup>    |
| -1.00399                | 8.19E-14  | C8orf46               |
| -1.002828               | 1.45E-17  | C11orf45 <sup>a</sup> |
| -0.993735               | 3.00E-57  | CHST11 <sup>a</sup>   |
| -0.992695               | 2.24E-21  | PIK3C2B <sup>a</sup>  |
| -0.985829               | 1.85E-40  | NT5DC1 <sup>a</sup>   |
| -0.981525               | 2.27E-18  | SLFN5                 |

Table SII. Continued.

| Log <sub>2</sub> Fold Δ | P-value   | Gene                  |
|-------------------------|-----------|-----------------------|
| -0.977364               | 2.36E-100 | GPRC5A <sup>a</sup>   |
| -0.974122               | 4.98E-43  | ZNF689 <sup>a</sup>   |
| -0.97202                | 7.67E-29  | RPS6KA5 <sup>a</sup>  |
| -0.971894               | 8.59E-09  | GATA6                 |
| -0.965423               | 1.94E-25  | DNAJC3 <sup>a</sup>   |
| -0.944995               | 1.05E-60  | HAUS2                 |
| -0.929672               | 8.64E-68  | BNC1 <sup>a</sup>     |
| -0.924587               | 1.27E-23  | IGFBP3                |
| -0.913039               | 4.90E-12  | NBL1 <sup>a</sup>     |
| -0.910182               | 2.99E-23  | KLF7                  |
| -0.905572               | 1.00E-28  | DSC3                  |
| -0.903236               | 1.09E-24  | PPM1F <sup>a</sup>    |
| -0.898077               | 0.002288  | UNC5B                 |
| -0.891074               | 3.45E-09  | CREB5                 |
| -0.886961               | 1.84E-58  | GPX8 <sup>a</sup>     |
| -0.878836               | 3.12E-30  | TAB1 <sup>a</sup>     |
| -0.865673               | 7.26E-35  | ETV6 <sup>a</sup>     |
| -0.864534               | 1.80E-12  | KIAA1919 <sup>a</sup> |
| -0.861236               | 1.46E-67  | SS18 <sup>a</sup>     |
| -0.86029                | 4.57E-55  | CRTC3 <sup>a</sup>    |
| -0.846525               | 4.78E-87  | ALKBH5                |
| -0.846142               | 3.72E-32  | EIF4EBP2 <sup>a</sup> |
| -0.845809               | 9.82E-31  | RAI14                 |
| -0.844843               | 9.08E-11  | NMNAT2 <sup>a</sup>   |
| -0.840407               | 7.55E-29  | SYNPO <sup>a</sup>    |
| -0.835484               | 3.05E-38  | UBP1 <sup>a</sup>     |
| -0.835228               | 2.02E-69  | IGF2R                 |
| -0.834303               | 0.002483  | RASD2                 |
| -0.827093               | 4.98E-14  | EVI5L <sup>a</sup>    |
| -0.819979               | 4.68E-08  | DUSP18                |
| -0.803766               | 7.27E-22  | B3GALT5               |
| -0.80101                | 0.001108  | MYB                   |
| -0.797409               | 9.14E-13  | FAM46A                |
| -0.790737               | 9.91E-22  | F2RL1 <sup>a</sup>    |
| -0.777406               | 4.05E-29  | JAK1 <sup>a</sup>     |
| -0.774742               | 2.81E-38  | SETD7 <sup>a</sup>    |
| -0.774737               | 8.37E-41  | SLC9A1 <sup>a</sup>   |
| -0.77464                | 0.003047  | CD302 <sup>a</sup>    |
| -0.773945               | 0.002904  | ARC                   |
| -0.764492               | 1.90E-48  | STK35 <sup>a</sup>    |
| -0.764193               | 1.38E-54  | PDE4DIP               |
| -0.763432               | 1.32E-26  | NDNL2 <sup>a</sup>    |
| -0.756                  | 4.54E-16  | CARD10                |
| -0.743276               | 6.30E-22  | CENPM <sup>a</sup>    |
| -0.736671               | 7.97E-16  | TRIOBP <sup>a</sup>   |
| -0.733288               | 1.71E-35  | RIPK1 <sup>a</sup>    |
| -0.733029               | 3.40E-14  | ARNT2                 |
| -0.723588               | 0.003209  | RCBTB2 <sup>a</sup>   |
| -0.719481               | 9.72E-10  | EPM2A <sup>a</sup>    |
| -0.712964               | 1.34E-07  | POU6F1                |
| -0.706676               | 2.74E-23  | DTNB                  |
| -0.701795               | 7.86E-17  | KBTBD11 <sup>a</sup>  |
| -0.699641               | 1.93E-15  | KIAA1324L             |
| -0.699317               | 4.48E-34  | TNFAIP2 <sup>a</sup>  |
| -0.696702               | 3.36E-36  | ANKRD40 <sup>a</sup>  |
| -0.695581               | 5.87E-26  | TEAD3 <sup>a</sup>    |

Table SII. Continued.

| Log <sub>2</sub> Fold Δ | P-value  | Gene                  |
|-------------------------|----------|-----------------------|
| -0.69367                | 2.13E-13 | ATN1 <sup>a</sup>     |
| -0.693621               | 2.46E-09 | SPIRE2                |
| -0.693166               | 6.35E-28 | ETS1                  |
| -0.69271                | 8.29E-14 | TMCO6 <sup>a</sup>    |
| -0.689877               | 1.96E-14 | NAPG                  |
| -0.687246               | 1.36E-27 | TMEM50A               |
| -0.686177               | 4.74E-12 | DPYSL5                |
| -0.683697               | 0.001653 | MAP1A <sup>a</sup>    |
| -0.681822               | 1.02E-11 | ZNF280B <sup>a</sup>  |
| -0.681255               | 1.99E-70 | GRAMD1B <sup>a</sup>  |
| -0.676129               | 7.08E-29 | SLC15A4               |
| -0.675738               | 0.005437 | RNF165                |
| -0.675021               | 5.47E-09 | SHANK3 <sup>a</sup>   |
| -0.672779               | 0.003994 | S1PR2                 |
| -0.666941               | 4.73E-07 | EBF4                  |
| -0.662044               | 2.95E-33 | SERINC3 <sup>a</sup>  |
| -0.661423               | 6.25E-06 | RWDD2A                |
| -0.66111                | 2.42E-10 | GLIS3                 |
| -0.660654               | 7.68E-07 | CPEB1 <sup>a</sup>    |
| -0.655903               | 3.24E-14 | MCC                   |
| -0.649018               | 4.84E-18 | DLGAP4                |
| -0.648391               | 1.77E-31 | RGP1 <sup>a</sup>     |
| -0.647487               | 7.26E-09 | TBX3                  |
| -0.640882               | 1.89E-06 | JAK3                  |
| -0.634232               | 2.46E-05 | TGFBR3                |
| -0.63357                | 2.43E-09 | FGF2 <sup>a</sup>     |
| -0.633554               | 7.80E-13 | MARK4 <sup>a</sup>    |
| -0.628986               | 2.01E-09 | HACE1                 |
| -0.622298               | 4.41E-09 | WDR91                 |
| -0.620449               | 4.39E-19 | H6PD                  |
| -0.619309               | 4.85E-15 | COL17A1               |
| -0.6187                 | 9.56E-22 | FRMD8                 |
| -0.618534               | 8.33E-10 | ZNF629                |
| -0.616808               | 6.45E-06 | PLEKHF1 <sup>a</sup>  |
| -0.616196               | 7.14E-34 | EXTL3                 |
| -0.613059               | 2.24E-08 | ACBD4                 |
| -0.610594               | 4.99E-38 | E2F4                  |
| -0.607982               | 5.01E-45 | DFFA                  |
| -0.607766               | 2.41E-34 | EIF3A <sup>a</sup>    |
| -0.604683               | 2.25E-20 | HERPUD1               |
| -0.604153               | 3.05E-18 | ENTPD7                |
| -0.603126               | 0.003138 | PLAC8                 |
| -0.601817               | 1.61E-21 | FOXJ2                 |
| -0.600622               | 7.64E-19 | ZHX3                  |
| -0.599866               | 5.29E-37 | FOXK2                 |
| -0.597996               | 5.16E-37 | MRPL49 <sup>a</sup>   |
| -0.592505               | 7.27E-05 | C1orf106              |
| -0.589053               | 2.05E-28 | KIAA0226 <sup>a</sup> |
| -0.588808               | 1.87E-06 | TRAF1                 |
| -0.588782               | 7.71E-34 | PSMB2                 |
| -0.586773               | 0.00044  | ITGB3                 |
| -0.586417               | 1.25E-18 | PODXL                 |
| -0.585755               | 3.76E-16 | PLEKHA2               |

Table SII. Continued.

| Log <sub>2</sub> Fold Δ | P-value   | Gene                  |
|-------------------------|-----------|-----------------------|
| -2.2229312              | 9.96E-90  | RUNX3 <sup>a</sup>    |
| -2.1341568              | 4.15E-91  | AGPAT1 <sup>a</sup>   |
| -1.9698423              | 4.45E-17  | COPZ2 <sup>a</sup>    |
| -1.9627379              | 6.34E-93  | ATP6V1C1 <sup>a</sup> |
| -1.8799076              | 6.04E-107 | TFAM <sup>a</sup>     |
| -1.8747969              | 5.89E-48  | CERCAM <sup>a</sup>   |
| -1.7819675              | 2.05E-108 | CDH1 <sup>a</sup>     |
| -1.5764824              | 1.98E-23  | BNC1 <sup>a</sup>     |
| -1.5756972              | 7.28E-11  | FBLN5 <sup>a</sup>    |
| -1.5238795              | 3.39E-83  | CCNDBP1 <sup>a</sup>  |
| -1.4993534              | 1.49E-57  | B3GALT6 <sup>a</sup>  |
| -1.4970858              | 1.20E-50  | KREMEN1 <sup>a</sup>  |
| -1.4829985              | 0.001257  | XYLT1                 |
| -1.4773294              | 2.44E-24  | SOD3                  |
| -1.4547267              | 2.58E-97  | ZADH2 <sup>a</sup>    |
| -1.4414072              | 1.85E-08  | MX2 <sup>a</sup>      |
| -1.4254666              | 5.48E-32  | SLC35D1 <sup>a</sup>  |
| -1.3855895              | 4.77E-05  | SNAI3                 |
| -1.3358104              | 4.11E-75  | PHF5A <sup>a</sup>    |
| -1.3103806              | 4.17E-42  | ARHGAP10 <sup>a</sup> |
| -1.2868673              | 1.83E-10  | EPST11                |
| -1.2624291              | 6.80E-54  | CPA4 <sup>a</sup>     |
| -1.1908324              | 6.89E-22  | TK2 <sup>a</sup>      |
| -1.1708553              | 1.84E-46  | TBC1D13 <sup>a</sup>  |
| -1.1613944              | 7.37E-35  | FHL3 <sup>a</sup>     |
| -1.155566               | 1.43E-08  | FAM167A <sup>a</sup>  |
| -1.1519809              | 2.96E-13  | RPS6KA5 <sup>a</sup>  |
| -1.1504799              | 1.37E-35  | FKBP5 <sup>a</sup>    |
| -1.1482078              | 3.94E-19  | BIN3 <sup>a</sup>     |
| -1.1203454              | 6.76E-20  | CBX7 <sup>a</sup>     |
| -1.1092956              | 2.95E-53  | FST                   |
| -1.106174               | 6.02E-05  | HTR7 <sup>a</sup>     |
| -1.1003833              | 4.34E-37  | ANKRD40 <sup>a</sup>  |
| -1.0950242              | 1.28E-39  | MBP <sup>a</sup>      |
| -1.0767989              | 2.25E-16  | TRIOBP <sup>a</sup>   |
| -1.0703336              | 1.87E-18  | PIK3C2B <sup>a</sup>  |
| -1.0293373              | 8.43E-10  | EPM2A <sup>a</sup>    |
| -1.0125463              | 2.94E-24  | MORN4 <sup>a</sup>    |
| -1.0109874              | 1.00E-10  | CENPM <sup>a</sup>    |
| -0.9835786              | 2.82E-18  | PPFIBP1 <sup>a</sup>  |
| -0.977487               | 0.003824  | IFFO1                 |
| -0.9664992              | 6.68E-52  | PRUNE <sup>a</sup>    |
| -0.9642812              | 3.17E-28  | CRTC3 <sup>a</sup>    |
| -0.9583287              | 9.67E-43  | FBXO21 <sup>a</sup>   |
| -0.9420463              | 2.76E-31  | GINS1 <sup>a</sup>    |
| -0.9378461              | 1.34E-09  | KCNMB4                |
| -0.9341459              | 8.60E-08  | NBL1 <sup>a</sup>     |
| -0.9336706              | 2.31E-16  | S100A2                |
| -0.9132788              | 2.06E-16  | C1QTNF1               |
| -0.911177               | 3.18E-51  | TNFAIP2 <sup>a</sup>  |
| -0.9045839              | 5.77E-19  | KCTD11 <sup>a</sup>   |

Table SII. Continued.

| Log <sub>2</sub> Fold Δ | P-value  | Gene                  |
|-------------------------|----------|-----------------------|
| -0.9008405              | 1.12E-13 | SETD7 <sup>a</sup>    |
| -0.897514               | 7.50E-10 | TMCO6 <sup>a</sup>    |
| -0.8834371              | 1.53E-17 | SNX18 <sup>a</sup>    |
| -0.8818182              | 2.07E-10 | LPAR5                 |
| -0.8767196              | 5.52E-09 | RCBTB2 <sup>a</sup>   |
| -0.8760609              | 4.98E-05 | VGLL3                 |
| -0.8738295              | 0.000208 | GPR63                 |
| -0.8614196              | 1.74E-23 | TNFRSF11A             |
| -0.8539737              | 2.18E-13 | TAB1 <sup>a</sup>     |
| -0.8482786              | 1.23E-11 | PMAIP1                |
| -0.8424874              | 8.56E-31 | GPRC5A <sup>a</sup>   |
| -0.8409095              | 1.61E-25 | SYNPO <sup>a</sup>    |
| -0.8324152              | 8.90E-26 | CHST11 <sup>a</sup>   |
| -0.8262269              | 7.41E-28 | PPM1F <sup>a</sup>    |
| -0.8193983              | 1.98E-24 | RNF11                 |
| -0.8173272              | 2.55E-08 | DDIT3 <sup>a</sup>    |
| -0.8161782              | 7.91E-16 | ENTPD3                |
| -0.81611                | 1.17E-09 | STAT1                 |
| -0.8126105              | 1.40E-08 | MAP1A <sup>a</sup>    |
| -0.8081048              | 0.008633 | HIC1                  |
| -0.8024112              | 7.33E-06 | PSMA2                 |
| -0.8006852              | 8.29E-60 | ATN1 <sup>a</sup>     |
| -0.7947532              | 1.28E-16 | ZNF689 <sup>a</sup>   |
| -0.7920097              | 1.28E-14 | JAK1 <sup>a</sup>     |
| -0.7909972              | 1.52E-08 | FAM124A               |
| -0.7889752              | 6.10E-17 | SS18 <sup>a</sup>     |
| -0.7829888              | 1.57E-25 | UBP1 <sup>a</sup>     |
| -0.7696743              | 2.75E-09 | ID3                   |
| -0.7690493              | 4.98E-12 | KCTD12 <sup>a</sup>   |
| -0.7686072              | 3.21E-08 | KIAA1919 <sup>a</sup> |
| -0.7664507              | 4.23E-22 | SERINC3 <sup>a</sup>  |
| -0.7648909              | 3.53E-05 | CD302 <sup>a</sup>    |
| -0.7527785              | 9.34E-19 | F2RL1 <sup>a</sup>    |
| -0.7446187              | 0.001865 | CPEB1 <sup>a</sup>    |
| -0.7437646              | 0.000106 | FGF2 <sup>a</sup>     |
| -0.742737               | 6.32E-08 | C11orf45 <sup>a</sup> |
| -0.7335771              | 8.78E-47 | SLC9A1 <sup>a</sup>   |
| -0.7325642              | 1.30E-18 | RGPI <sup>a</sup>     |
| -0.7210472              | 4.51E-09 | TSEN34                |
| -0.7188159              | 1.12E-05 | HES4                  |
| -0.7121319              | 2.80E-17 | BLMH                  |
| -0.7095764              | 1.20E-15 | KIAA0226 <sup>a</sup> |
| -0.7009064              | 1.10E-14 | GRAMD1B <sup>a</sup>  |
| -0.697517               | 4.91E-39 | FKBP9                 |
| -0.6935211              | 8.51E-06 | GXYLT2                |
| -0.6908191              | 2.36E-24 | TEAD3 <sup>a</sup>    |
| -0.6869529              | 2.45E-08 | KBTBD11 <sup>a</sup>  |
| -0.6858715              | 3.19E-27 | GPX8 <sup>a</sup>     |
| -0.6822667              | 2.70E-14 | NDNL2 <sup>a</sup>    |
| -0.6810157              | 0.00039  | RRAGD                 |
| -0.6789664              | 2.55E-08 | CUL5                  |
| -0.6701761              | 4.30E-20 | MRPL49 <sup>a</sup>   |
| -0.6670205              | 2.96E-30 | PRSS23                |
| -0.6654154              | 0.001082 | CASP10                |
| -0.6644094              | 0.003024 | UQCR11                |
| -0.6620288              | 5.56E-07 | DNAJC3 <sup>a</sup>   |

Table SII. Continued.

| Log <sub>2</sub> Fold Δ | P-value  | Gene                  |
|-------------------------|----------|-----------------------|
| -0.6609554              | 1.34E-05 | KLHL3                 |
| -0.659404               | 3.56E-12 | ZNF365                |
| -0.654998               | 1.98E-24 | MARK4 <sup>a</sup>    |
| -0.6535302              | 1.28E-06 | FOXA2                 |
| -0.6535199              | 8.64E-29 | LIX1L                 |
| -0.6515205              | 5.49E-15 | STK35 <sup>a</sup>    |
| -0.6491715              | 1.57E-05 | ZNF280B <sup>a</sup>  |
| -0.6468406              | 4.78E-05 | MAPK8IP2              |
| -0.6414559              | 0.008381 | LYL1                  |
| -0.641128               | 1.06E-11 | TMX4                  |
| -0.6410306              | 4.42E-10 | EIF4EBP2 <sup>a</sup> |
| -0.636393               | 9.08E-06 | FTO                   |
| -0.6346604              | 6.14E-07 | GSTO2                 |
| -0.6332617              | 4.44E-17 | PTPRU                 |
| -0.6199476              | 7.59E-11 | EVI5L <sup>a</sup>    |
| -0.6145969              | 9.63E-15 | NT5DC1 <sup>a</sup>   |
| -0.6081245              | 0.000387 | DGCR6L                |
| -0.606595               | 2.46E-10 | IER3                  |
| -0.6058245              | 7.08E-42 | ACTN4                 |
| -0.6029642              | 4.22E-05 | PLEKHF1 <sup>a</sup>  |
| -0.6026046              | 0.001481 | NDUFA9                |
| -0.6017323              | 2.70E-09 | NMNAT2 <sup>a</sup>   |
| -0.6011277              | 1.20E-07 | APOBEC3C              |
| -0.5995144              | 6.79E-13 | RIPK1 <sup>a</sup>    |
| -0.5981072              | 3.63E-12 | SHANK3 <sup>a</sup>   |
| -0.5959862              | 9.61E-07 | RASA4                 |
| -0.5951636              | 1.36E-10 | ETV6 <sup>a</sup>     |
| -0.5901149              | 3.56E-09 | EIF3A <sup>a</sup>    |

The listed genes were decreased in transfected vs. normal samples in Oncomine prostate cancer cohorts. The candidate genes are shown by decreasing magnitude of fold change following miR-769-5p mimics transfection. <sup>a</sup>The candidates that appeared in RNA sequencing for both DU145 and PC-3. miR, microRNA.
